# Supplementary material for: Echinacoside ameliorates the memory impairment and cholinergic deficit induced by amyloid beta peptides via the inhibition of amyloid deposition and toxicology
Source: Royal Society of Chemistry journal article supplement (doi:10.1039/c7fo00267j), 2017-01-01
Supplement: c7fo00267j1.pdf [file c7fo00267j1.pdf]

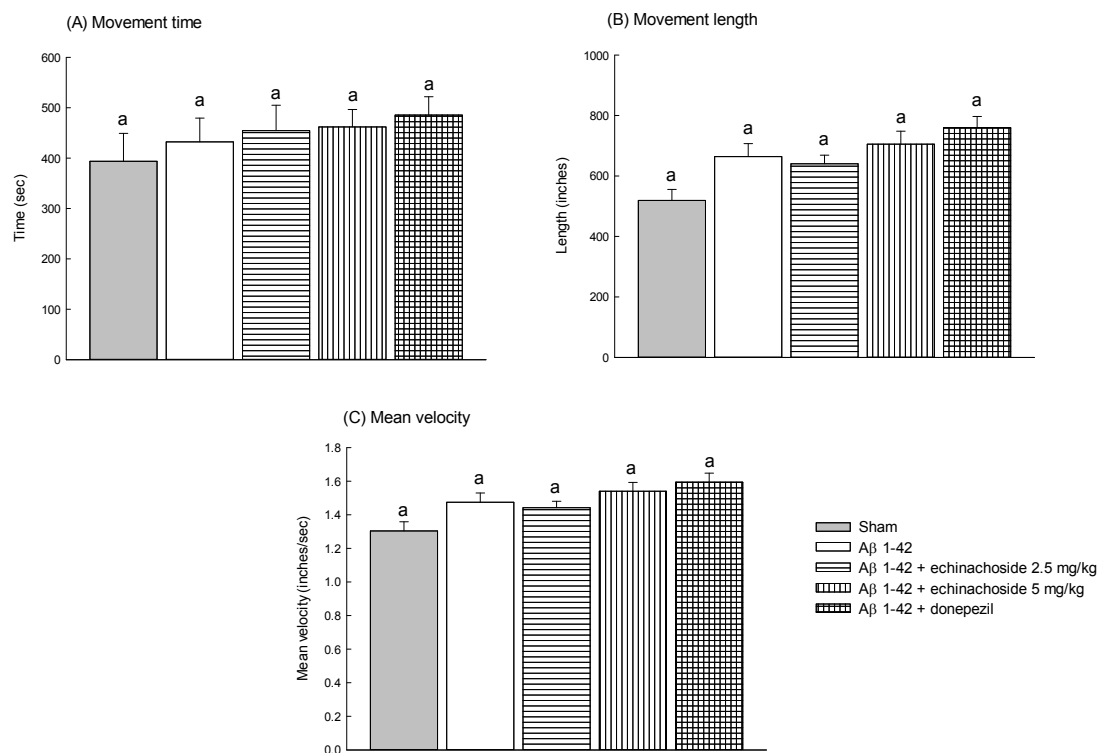

Supplementary data. Effects of echinacoside (2.5, 5 mg/kg) or donepezil (0.75 mg/kg) on the locomotor activity including movement time (A), movement length (B) and mean velocity (C), and in A $\beta$  1-42-infused rats. Columns indicate means  $\pm$  SEM (N=6). The mean values which share the same superscript symbol(s) are not significant different.
